# Supplementary material for: Genome-wide analysis of the R2R3-MYB transcription factor genes in Chinese cabbage (Brassica rapa ssp. pekinensis) reveals their stress and hormone responsive patterns
Source: PubMed Central journal article supplement (PMC4334723; doi:10.1186/s12864-015-1216-y), 2015-01-23

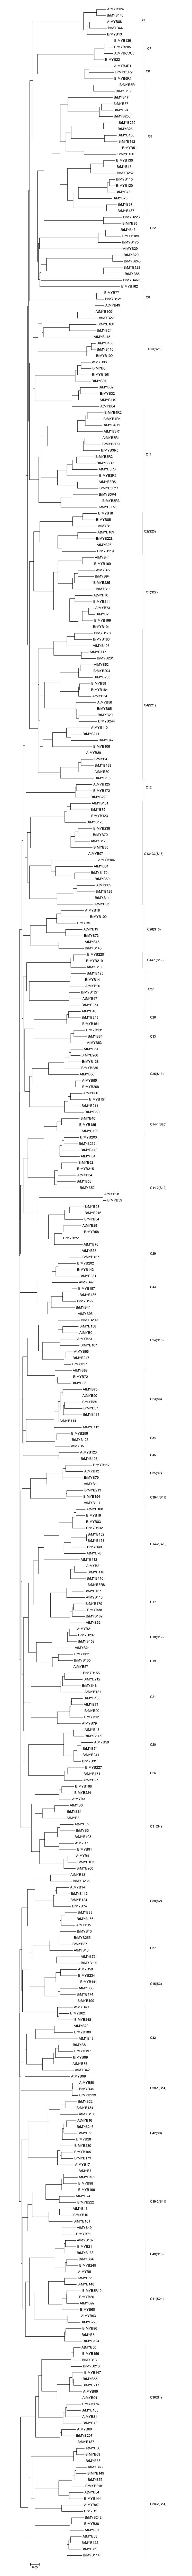

Supplement: 12864_2015_1216_MOESM5_ESM.pdf [file 12864_2015_1216_MOESM5_ESM.pdf]
